# Supplementary material for: Electrochemical and Mechanistic Study of Reactivities of α-, β-, γ-, and δ-Tocopherol toward Electrogenerated Superoxide in N,N-Dimethylformamide through Proton-Coupled Electron Transfer
Source: MDPI journal article supplement (doi:10.3390/antiox11010009), 2021-12-22
Supplement: s1 [file s1]

# Electrochemical and Mechanistic Study of Reactivities of $\alpha$ -, $\beta$ -, $\gamma$ -, and $\delta$ -Tocopherol Toward Superoxide in *N,N*- Dimethylformamide through Proton-Coupled Electron Transfer

Tatsushi Nakayama <sup>1\*</sup>, Ryo Honda <sup>2</sup>, Kazuo Kuwata <sup>2</sup>, Shigeyuki Usui <sup>1</sup>, and Bunji Uno <sup>3</sup>

<sup>1</sup> Department of Pharmacy, Gifu Pharmaceutical University, 1-25-4 Daigaku-nishi, Gifu 501-1196, Japan

<sup>2</sup> United Graduate School of Drug Discovery and Medical Information Sciences, Gifu University, 1-1 Yanagido, Gifu 501-1193, Japan

<sup>3</sup> Faculty of Pharmacy, Gifu University of Medical Science, 4-3-3 Nijigaoka, Kani, Gifu 509-0923, Japan

\* Correspondence: [tnakayama@gifu-pu.ac.jp](mailto:tnakayama@gifu-pu.ac.jp)

## Table of contents

|          |                                                                                            |
|----------|--------------------------------------------------------------------------------------------|
| Pages S2 | Figure S1; scheme of the <i>in-situ</i> electrolytic ESR spectral system                   |
|          | Table S1; comparisons of the $\Delta G^\circ$ s for two mechanisms                         |
| Pages S3 | Figure S2; change in HOMO–LUMO energies                                                    |
| Pages S4 | Figure S3; energy profiles along ET–PT via TS between TOH and HO <sub>2</sub> <sup>•</sup> |
| Pages S5 | Figure S4: Plausible PCET pathways between O <sub>2</sub> <sup>•−</sup> and $\alpha$ -TOH  |
|          | Figure S5: Plausible PCET pathways between O <sub>2</sub> <sup>•−</sup> and $\gamma$ -TOH. |

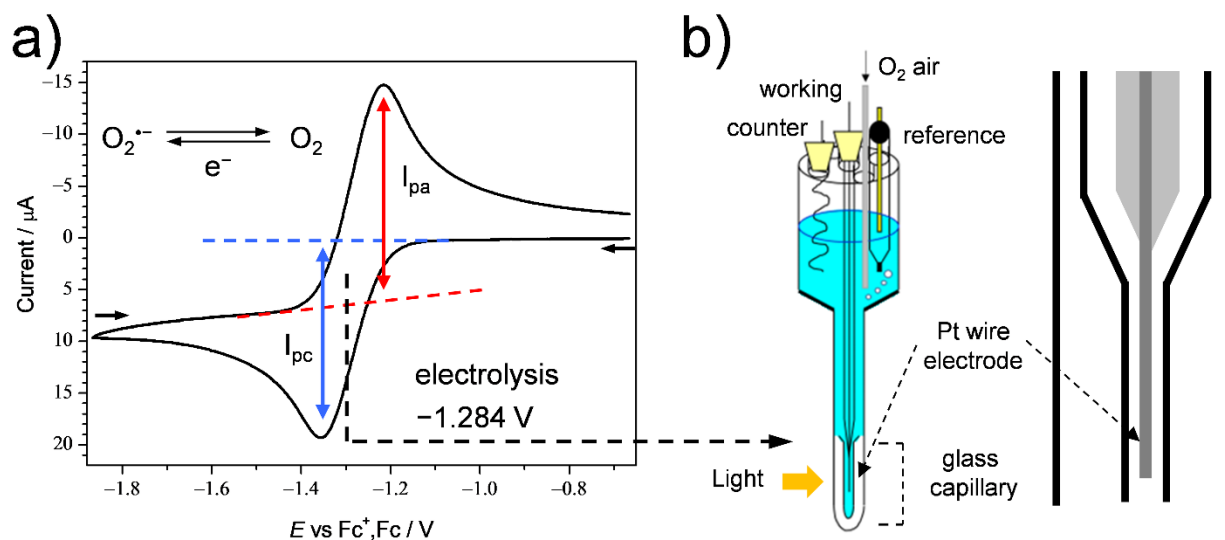

**Figure S1.** *In situ* electrolytic ESR spectral system. (a) Cyclic voltammograms of  $O_2/O_2^{\bullet-}$  for potential determination. (b) *In situ* ESR system, composed of an electrochemical ESR cell with a glass small tip, air tube for  $O_2$  bubbling, and three electrode system using a 0.5-mm-diameter straight Pt wire sealed in a glass capillary as working electrode.

**Table S1.** Free energy changes ( $\Delta G^\circ/kJ\ mol^{-1}$ , 298.15 K) of ET between (a)  $TO^-$  and  $HO_2^\bullet$  (along intermolecular ET-PT), and between (b) TOH and  $HO_2^\bullet$  (along PCET), in DMF.

|                           | $\alpha$ - $TO^-/\alpha$ -TOH | $\beta$ - $TO^-/\beta$ -TOH | $\gamma$ - $TO^-/\gamma$ -TOH | $\delta$ - $TO^-/\delta$ -TOH |
|---------------------------|-------------------------------|-----------------------------|-------------------------------|-------------------------------|
| $TO^-$ and $HO_2^\bullet$ | -50.3                         | -40.1                       | -38.6                         | -28.4                         |
| TOH and $HO_2^\bullet$    | 100.7                         | 103.3                       | 111.4                         | 117.1                         |

<sup>1</sup>  $\Delta G^\circ$ s were calculated using DFT at the (U)B3LYP/PCM/6-311+G(d,p) level. <sup>2</sup> Electron transfer (ET), proton transfer (PT), proton-coupled electron transfer (PCET).

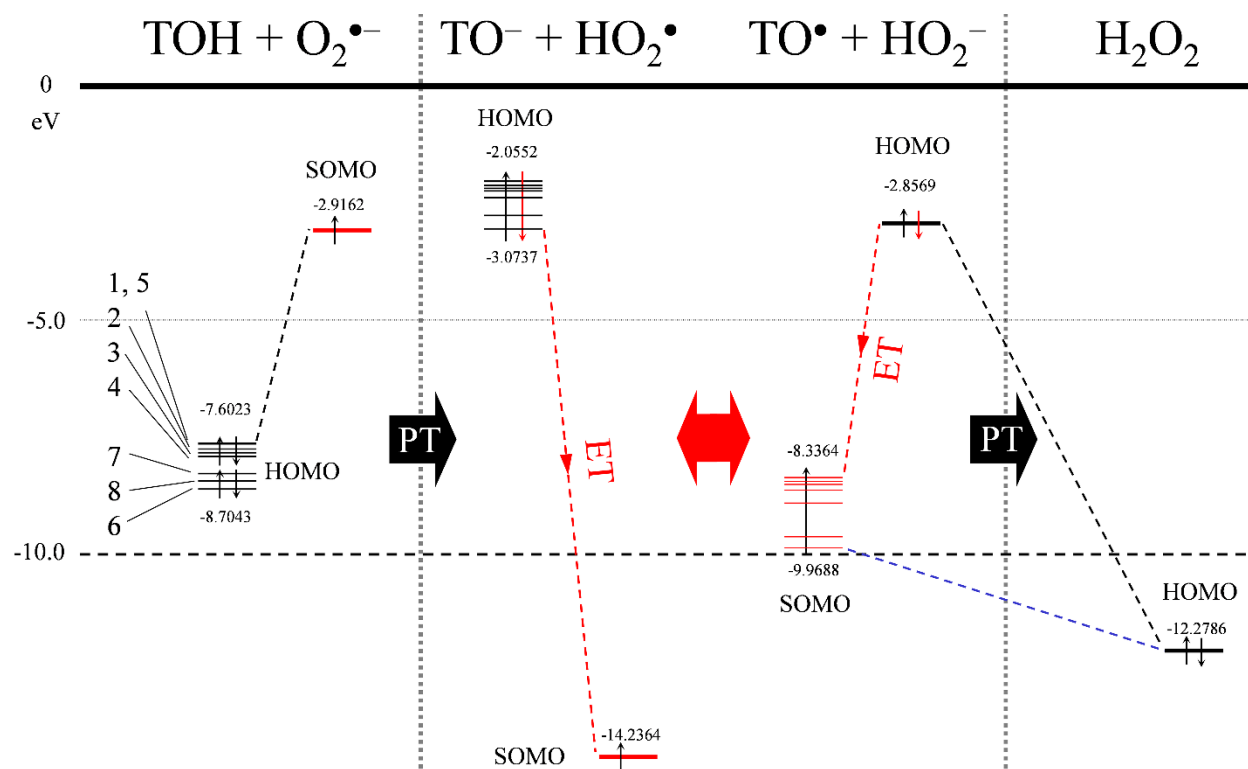

**Figure S2.** Change in highest occupied molecular orbital-lowest unoccupied molecular orbital (HOMO—LUMO) energies ( $E_h/a.u.$ ) along the  $O_2^{\bullet-}$  elimination reaction (the first proton transfer (PT), electron transfer (ET), and the second PT) by (a–d)  $\alpha$ -,  $\beta$ -,  $\gamma$ -, and  $\delta$ -TOH, (e) 2,2,5,7,8-pentamethyl-6-chroman-6-ol, (f) homogentisic acid  $\gamma$ -lactone, (g) 2,3-dihydro-2,2-dimethyl-7-hydroxybenzofuran, and (h) trans-*para*-coumaric acid, calculated with the HF/6-311+G(d,p) method.

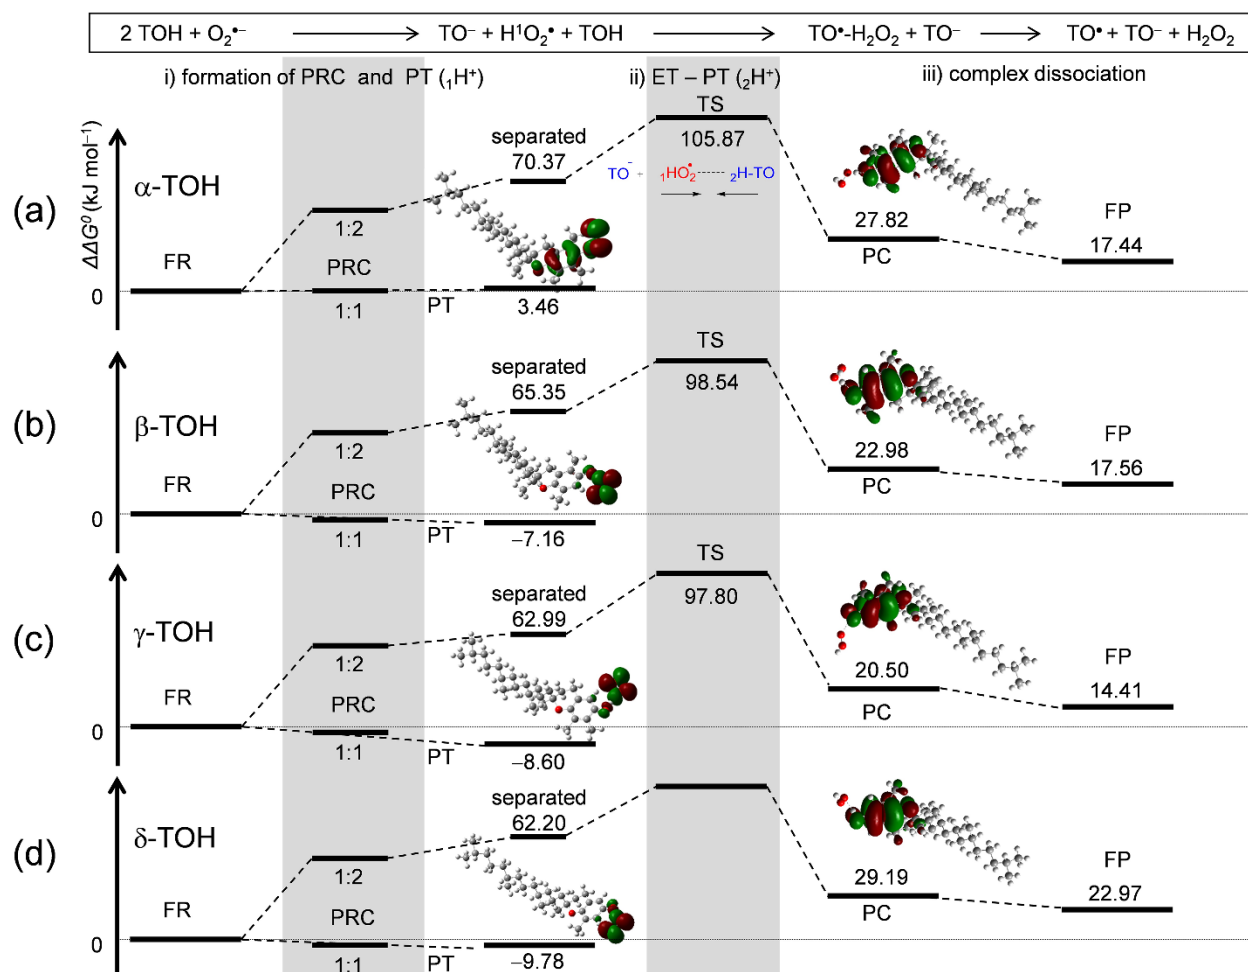

**Figure S3.** Energy profiles along PCET involving two PTs and one ET between two molecule of TOH ( $\alpha$ -,  $\beta$ -,  $\gamma$ -, and  $\delta$ -TOH) and  $\text{O}_2^{\bullet-}$  in DMF, calculated using DFT-(U)B3LYP/PCM/6-311+G(d,p) method. Activation energies ( $\text{kJ mol}^{-1}$ ) of transition states (TS) were obtained for the 1:1 ET-PT pathway between TOH ( $\alpha$ -,  $\beta$ -, and  $\gamma$ -TOH) and  $\text{HO}_2^{\bullet}$ .

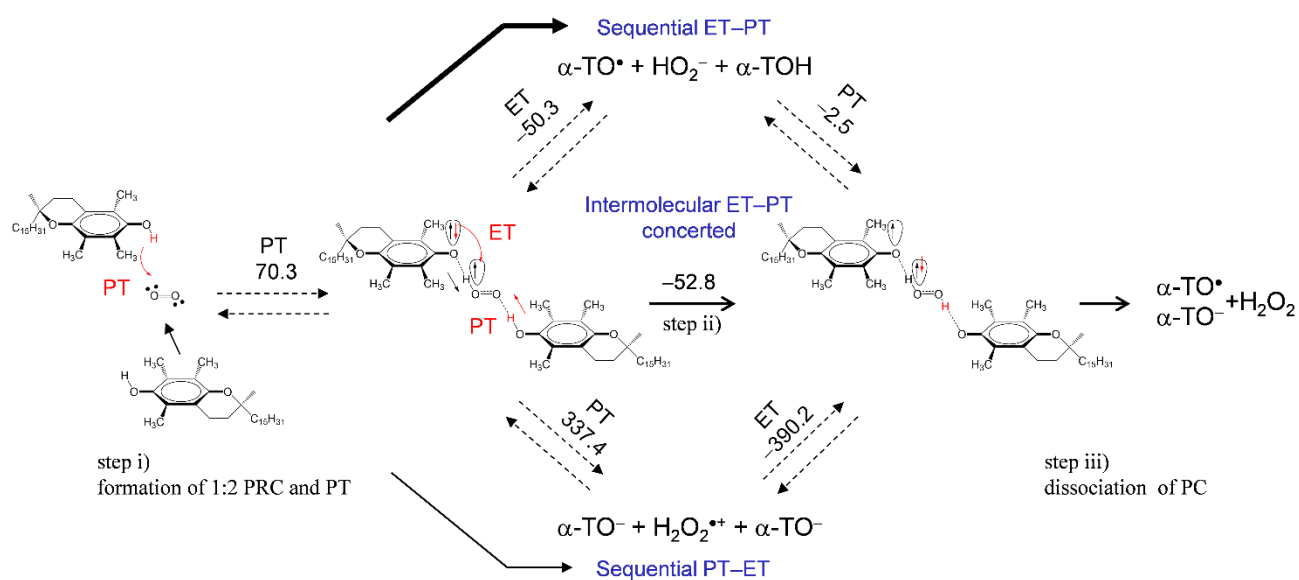

**Figure S4.** Plausible mechanism and the  $\Delta G^\circ$ s (kJ mol<sup>-1</sup>, 298.15 K) for the PCET pathways between  $\text{O}_2^{\bullet-}$  and  $\alpha\text{-TOH}$  involving two PTs and one ET in DMF. The  $\Delta G^\circ$ s were calculated using DFT-(U)B3LYP/PCM/6-311+G(d,p) method.

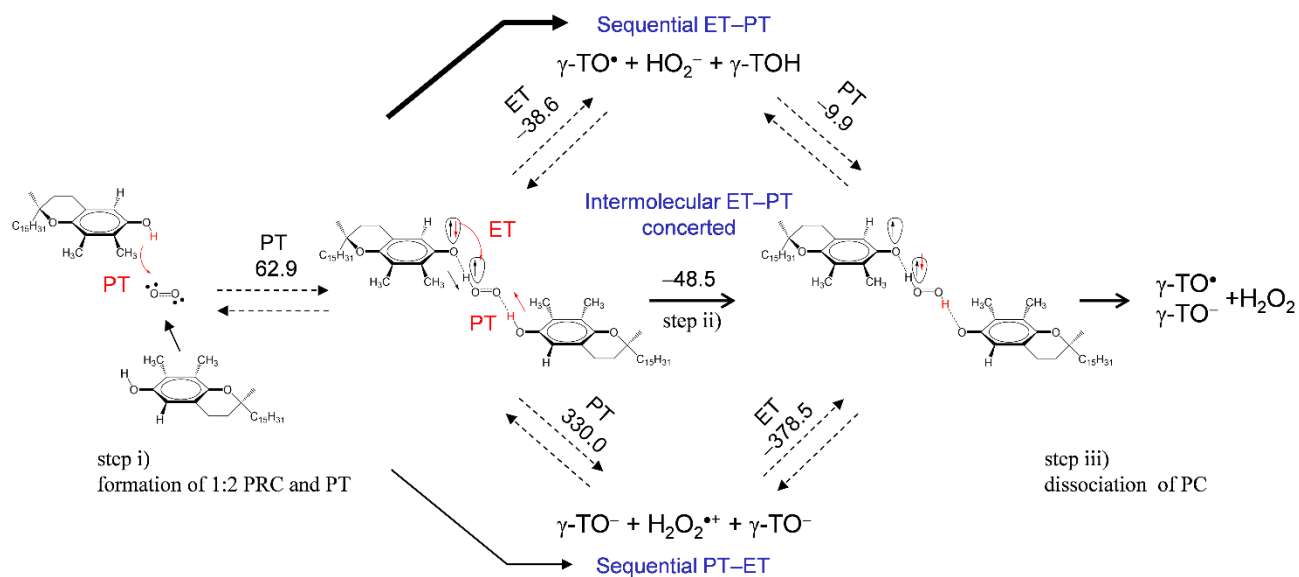

**Figure S5** Plausible mechanism and the  $\Delta G^\circ$ s (kJ mol<sup>-1</sup>, 298.15 K) for the PCET pathways between  $\text{O}_2^{\bullet-}$  and  $\gamma\text{-TOH}$  involving two PTs and one ET in DMF. The  $\Delta G^\circ$ s were calculated using DFT-(U)B3LYP/PCM/6-311+G(d,p) method.

**Table S2.** Calculated geometries of the complexes formed between (a)  $\alpha$ -TOH and  $O_2^{\bullet-}$ , (b)  $\alpha$ -TOH and  $HO_2^{\bullet}$  in DMF, with DFT-(U)B3LYP/PCM/6-311+G(d,p).

| Center Number | (a) $\alpha$ -TOH and $O_2^{\bullet-}$ |                         |         |         | (b) $\alpha$ -TOH and $HO_2^{\bullet}$ |                         |         |         |
|---------------|----------------------------------------|-------------------------|---------|---------|----------------------------------------|-------------------------|---------|---------|
|               | Atomic Number                          | Coordinates (Angstroms) |         |         | Atomic Number                          | Coordinates (Angstroms) |         |         |
|               |                                        | X                       | Y       | Z       |                                        | X                       | Y       | Z       |
| 1             | 6                                      | 5.17795                 | -0.0119 | 1.34123 | 6                                      | -5.0866                 | -0.1098 | -1.35   |
| 2             | 6                                      | 4.89373                 | -0.9748 | 0.35804 | 6                                      | -4.6677                 | -1.0633 | -0.3621 |
| 3             | 6                                      | 5.32702                 | -0.8179 | -0.9642 | 6                                      | -5.094                  | -1.0121 | 0.98897 |
| 4             | 6                                      | 6.02599                 | 0.34804 | -1.3261 | 6                                      | -5.9012                 | 0.03364 | 1.39451 |
| 5             | 6                                      | 6.31705                 | 1.31594 | -0.3504 | 6                                      | -6.3266                 | 1.03864 | 0.43294 |
| 6             | 6                                      | 5.91992                 | 1.12752 | 0.98927 | 6                                      | -5.8955                 | 0.93479 | -0.9592 |
| 7             | 6                                      | 5.02668                 | -1.8877 | -1.9931 | 6                                      | -4.6682                 | -2.1031 | 1.94516 |
| 8             | 1                                      | 4.27648                 | -1.5185 | -2.7035 | 1                                      | -3.9051                 | -1.7176 | 2.63074 |
| 9             | 1                                      | 5.91956                 | -2.0903 | -2.5921 | 1                                      | -5.5148                 | -2.3895 | 2.57385 |
| 10            | 6                                      | 6.46693                 | 0.55579 | -2.7562 | 6                                      | -6.3725                 | 0.15468 | 2.81674 |
| 11            | 1                                      | 7.26094                 | -0.1452 | -3.0402 | 1                                      | -7.1045                 | -0.6251 | 3.05761 |
| 12            | 1                                      | 5.64171                 | 0.3979  | -3.4575 | 1                                      | -5.5443                 | 0.04261 | 3.52193 |
| 13            | 1                                      | 6.84898                 | 1.56538 | -2.8935 | 1                                      | -6.8464                 | 1.12077 | 2.97794 |
| 14            | 6                                      | 4.70754                 | -0.2185 | 2.76305 | 6                                      | -4.5889                 | -0.3277 | -2.7581 |
| 15            | 1                                      | 3.92839                 | -0.9774 | 2.80729 | 1                                      | -4.8335                 | -1.3369 | -3.0987 |
| 16            | 1                                      | 5.52594                 | -0.5484 | 3.41486 | 1                                      | -5.017                  | 0.37964 | -3.4629 |
| 17            | 1                                      | 4.31391                 | 0.70696 | 3.1906  | 1                                      | -3.4997                 | -0.2387 | -2.8032 |
| 18            | 6                                      | 6.30453                 | 2.13599 | 2.04789 | 6                                      | -6.3861                 | 2.01883 | -1.8806 |
| 19            | 1                                      | 6.63448                 | 1.63961 | 2.96409 | 1                                      | -5.9728                 | 1.94245 | -2.8827 |
| 20            | 1                                      | 7.11259                 | 2.77882 | 1.70058 | 1                                      | -7.4774                 | 1.99258 | -1.9623 |
| 21            | 1                                      | 5.4653                  | 2.78647 | 2.31983 | 1                                      | -6.1254                 | 3.00349 | -1.4832 |
| 22            | 6                                      | 4.54859                 | -3.1904 | -1.3476 | 6                                      | -4.1518                 | -3.3349 | 1.20045 |
| 23            | 1                                      | 4.09437                 | -3.8461 | -2.0958 | 1                                      | -3.6615                 | -4.0243 | 1.8918  |
| 24            | 1                                      | 5.40532                 | -3.7273 | -0.927  | 1                                      | -4.9942                 | -3.8723 | 0.75373 |
| 25            | 6                                      | 3.55316                 | -2.9388 | -0.2068 | 6                                      | -3.1747                 | -2.9677 | 0.08083 |
| 26            | 8                                      | 4.20698                 | -2.0972 | 0.78519 | 8                                      | -3.8527                 | -2.0212 | -0.8297 |
| 27            | 6                                      | 3.25079                 | -4.2406 | 0.53309 | 6                                      | -2.8696                 | -4.177  | -0.7971 |
| 28            | 1                                      | 4.18105                 | -4.7299 | 0.83152 | 1                                      | -3.7967                 | -4.6499 | -1.1279 |
| 29            | 1                                      | 2.65886                 | -4.0561 | 1.43108 | 1                                      | -2.2943                 | -3.8914 | -1.6784 |
| 30            | 1                                      | 2.69301                 | -4.9228 | -0.1137 | 1                                      | -2.2908                 | -4.9094 | -0.2293 |
| 31            | 6                                      | 2.26979                 | -2.2468 | -0.7163 | 6                                      | -1.9016                 | -2.2856 | 0.62058 |
| 32            | 1                                      | 2.55021                 | -1.3108 | -1.2095 | 1                                      | -2.1943                 | -1.4003 | 1.1939  |
| 33            | 6                                      | 1.20385                 | -1.9368 | 0.34274 | 6                                      | -0.8576                 | -1.8696 | -0.4241 |
| 34            | 1                                      | 0.81937                 | -2.8677 | 0.77434 | 1                                      | -0.4617                 | -2.7552 | -0.9326 |
| 35            | 1                                      | 1.66891                 | -1.3807 | 1.16137 | 1                                      | -1.3415                 | -1.2573 | -1.1899 |
| 36            | 8                                      | 7.04163                 | 2.4191  | -0.7245 | 8                                      | -7.0748                 | 1.98978 | 0.8065  |
| 37            | 1                                      | 6.61288                 | 3.29266 | -0.4234 | 1                                      | -7.9013                 | 3.33861 | 0.18293 |
| 38            | 1                                      | 1.83796                 | -2.8857 | -1.4961 | 1                                      | -1.4472                 | -2.9783 | 1.33835 |
| 39            | 6                                      | 0.02765                 | -1.1419 | -0.2413 | 6                                      | 0.30935                 | -1.1015 | 0.21184 |
| 40            | 1                                      | -0.3601                 | -1.6852 | -1.1126 | 1                                      | 0.71538                 | -1.7044 | 1.03388 |
| 41            | 1                                      | 0.3931                  | -0.1781 | -0.6219 | 1                                      | -0.0697                 | -0.1776 | 0.66984 |
| 42            | 6                                      | -1.1429                 | -0.8844 | 0.72877 | 6                                      | 1.46432                 | -0.748  | -0.7466 |
| 43            | 1                                      | -1.4569                 | -1.858  | 1.13271 | 1                                      | 1.79572                 | -1.6829 | -1.2218 |
| 44            | 6                                      | -0.7214                 | 0.00563 | 1.90834 | 6                                      | 1.01221                 | 0.21472 | -1.8556 |
| 45            | 1                                      | 0.10889                 | -0.4317 | 2.46794 | 1                                      | 0.19104                 | -0.2019 | -2.4438 |
| 46            | 1                                      | -0.4004                 | 0.99091 | 1.55049 | 1                                      | 0.66795                 | 1.16224 | -1.4249 |
| 47            | 1                                      | -1.5418                 | 0.15816 | 2.61362 | 1                                      | 1.82452                 | 0.44033 | -2.5505 |
| 48            | 6                                      | -2.3435                 | -0.2936 | -0.0378 | 6                                      | 2.65844                 | -0.1865 | 0.05136 |
| 49            | 1                                      | -2.5251                 | -0.9139 | -0.9247 | 1                                      | 2.85556                 | -0.8583 | 0.89634 |
| 50            | 1                                      | -2.0697                 | 0.70193 | -0.4142 | 1                                      | 2.36989                 | 0.77848 | 0.49099 |
| 51            | 6                                      | -3.6516                 | -0.1918 | 0.7585  | 6                                      | 3.96015                 | -0.0129 | -0.7429 |

|    |   |         |         |         |   |         |         |         |
|----|---|---------|---------|---------|---|---------|---------|---------|
| 52 | 1 | -3.5117 | 0.47388 | 1.61482 | 1 | 3.8031  | 0.69747 | -1.5594 |
| 53 | 1 | -3.8984 | -1.1794 | 1.17118 | 1 | 4.22427 | -0.9703 | -1.212  |
| 54 | 6 | -4.827  | 0.30139 | -0.0962 | 6 | 5.12961 | 0.45464 | 0.13413 |
| 55 | 1 | -4.5959 | 1.30149 | -0.4889 | 1 | 4.88381 | 1.42986 | 0.57717 |
| 56 | 1 | -4.9174 | -0.3546 | -0.9713 | 1 | 5.23235 | -0.2433 | 0.97467 |
| 57 | 6 | -6.1933 | 0.34954 | 0.61751 | 6 | 6.49344 | 0.56016 | -0.578  |
| 58 | 1 | -6.3713 | -0.6432 | 1.0563  | 1 | 6.68915 | -0.4087 | -1.0606 |
| 59 | 6 | -7.3161 | 0.60976 | -0.4069 | 6 | 7.61274 | 0.79564 | 0.45617 |
| 60 | 1 | -7.1835 | 1.61422 | -0.8326 | 1 | 7.46412 | 1.77916 | 0.92338 |
| 61 | 1 | -7.1906 | -0.0922 | -1.2412 | 1 | 7.49963 | 0.05752 | 1.26039 |
| 62 | 6 | -6.208  | 1.38164 | 1.75585 | 6 | 6.48721 | 1.64174 | -1.6695 |
| 63 | 1 | -6.0397 | 2.3906  | 1.36128 | 1 | 6.29805 | 2.62863 | -1.231  |
| 64 | 1 | -7.1636 | 1.38627 | 2.28549 | 1 | 7.44288 | 1.68941 | -2.197  |
| 65 | 1 | -5.4296 | 1.17936 | 2.4955  | 1 | 5.71365 | 1.45633 | -2.4186 |
| 66 | 6 | -8.7473 | 0.4712  | 0.12956 | 6 | 9.04558 | 0.70301 | -0.0859 |
| 67 | 1 | -8.8509 | -0.509  | 0.60944 | 1 | 9.16532 | -0.2553 | -0.6046 |
| 68 | 1 | -8.9318 | 1.21824 | 0.91004 | 1 | 9.21665 | 1.48362 | -0.836  |
| 69 | 6 | -9.8076 | 0.63354 | -0.9679 | 6 | 10.1039 | 0.83943 | 1.01688 |
| 70 | 1 | -9.6714 | -0.151  | -1.7254 | 1 | 9.98118 | 0.0236  | 1.74298 |
| 71 | 1 | -9.6317 | 1.5866  | -1.4831 | 1 | 9.91295 | 1.76852 | 1.56919 |
| 72 | 6 | -11.27  | 0.60743 | -0.4837 | 6 | 11.5661 | 0.8562  | 0.53196 |
| 73 | 1 | -11.374 | 1.37285 | 0.29788 | 1 | 11.6568 | 1.65301 | -0.2193 |
| 74 | 6 | -11.664 | -0.7458 | 0.12645 | 6 | 11.9819 | -0.4656 | -0.1303 |
| 75 | 1 | -11.051 | -1      | 0.99439 | 1 | 11.3722 | -0.6961 | -1.0074 |
| 76 | 1 | -12.709 | -0.7372 | 0.45154 | 1 | 13.0263 | -0.4272 | -0.455  |
| 77 | 1 | -11.551 | -1.5494 | -0.6106 | 1 | 11.8832 | -1.2989 | 0.57499 |
| 78 | 6 | -12.223 | 0.97749 | -1.6291 | 6 | 12.5141 | 1.19705 | 1.6908  |
| 79 | 1 | -13.263 | 1.0012  | -1.2881 | 1 | 13.5528 | 1.25109 | 1.35085 |
| 80 | 1 | -11.983 | 1.96085 | -2.0449 | 1 | 12.2582 | 2.1594  | 2.14456 |
| 81 | 1 | -12.157 | 0.24587 | -2.4424 | 1 | 12.4602 | 0.43329 | 2.47498 |
| 82 | 8 | 6.01419 | 4.70641 | -0.1084 | 8 | -8.4253 | 4.12422 | -0.1176 |
| 83 | 8 | 5.29262 | 5.08978 | -1.1664 | 8 | -8.9439 | 4.63755 | 1.13873 |
| 84 |   |         |         |         | 1 | -9.8674 | 4.34939 | 1.10302 |

**Table S3.** Calculated geometries of the complexes formed between (a)  $\beta$ -TOH and  $O_2^{\cdot-}$ , (b)  $\beta$ -TOH and  $HO_2^{\cdot}$  in DMF, with DFT-(U)B3LYP/PCM/6-311+G(d,p).

|               | (a) $\beta$ -TOH and $O_2^{\cdot-}$ |                         |       |        | (b) $\beta$ -TOH and $HO_2^{\cdot}$ |                         |          |          |
|---------------|-------------------------------------|-------------------------|-------|--------|-------------------------------------|-------------------------|----------|----------|
| Center Number | Atomic Number                       | Coordinates (Angstroms) |       |        | Atomic Number                       | Coordinates (Angstroms) |          |          |
|               |                                     | X                       | Y     | Z      |                                     | X                       | Y        | Z        |
| 1             | 6                                   | -5.314                  | 0.456 | -1.089 | 6                                   | -5.37883                | 0.395127 | -1.12477 |
| 2             | 6                                   | -5.006                  | -0.73 | -0.397 | 6                                   | -4.9627                 | -0.76919 | -0.39814 |
| 3             | 6                                   | -5.42                   | -0.92 | 0.9268 | 6                                   | -5.37531                | -1.01134 | 0.93898  |
| 4             | 6                                   | -6.133                  | 0.096 | 1.5974 | 6                                   | -6.16012                | -0.07501 | 1.592193 |
| 5             | 6                                   | -6.442                  | 1.28  | 0.9097 | 6                                   | -6.58324                | 1.12938  | 0.891216 |
| 6             | 6                                   | -6.035                  | 1.443 | -0.421 | 6                                   | -6.16532                | 1.306252 | -0.47783 |
| 7             | 6                                   | -5.092                  | -2.22 | 1.6316 | 6                                   | -4.95332                | -2.29624 | 1.614883 |
| 8             | 1                                   | -4.324                  | -2.04 | 2.3949 | 1                                   | -4.16792                | -2.08645 | 2.34967  |
| 9             | 1                                   | -5.969                  | -2.58 | 2.1782 | 1                                   | -5.79209                | -2.70285 | 2.184838 |
| 10            | 6                                   | -4.879                  | 0.643 | -2.521 | 6                                   | -4.93614                | 0.582523 | -2.5502  |
| 11            | 1                                   | -3.794                  | 0.546 | -2.626 | 1                                   | -3.84557                | 0.609088 | -2.62429 |
| 12            | 1                                   | -5.325                  | -0.11 | -3.178 | 1                                   | -5.2754                 | -0.24477 | -3.17988 |
| 13            | 1                                   | -5.173                  | 1.628 | -2.887 | 1                                   | -5.33571                | 1.513251 | -2.95403 |
| 14            | 6                                   | -4.631                  | -3.3  | 0.6533 | 6                                   | -4.48048                | -3.33861 | 0.599885 |
| 15            | 1                                   | -4.167                  | -4.13 | 1.192  | 1                                   | -3.99695                | -4.17586 | 1.10832  |
| 16            | 1                                   | -5.499                  | -3.71 | 0.1221 | 1                                   | -5.3442                 | -3.74396 | 0.063456 |
| 17            | 6                                   | -3.653                  | -2.76 | -0.399 | 6                                   | -3.5117                 | -2.75328 | -0.43094 |
| 18            | 8                                   | -4.314                  | -1.68 | -1.12  | 8                                   | -4.17553                | -1.60491 | -1.08743 |
| 19            | 6                                   | -3.374                  | -3.82 | -1.462 | 6                                   | -3.25984                | -3.73857 | -1.56712 |
| 20            | 1                                   | -4.312                  | -4.21 | -1.86  | 1                                   | -4.2067                 | -4.09865 | -1.97494 |
| 21            | 1                                   | -2.798                  | -3.41 | -2.291 | 1                                   | -2.69024                | -3.27557 | -2.37364 |
| 22            | 1                                   | -2.807                  | -4.65 | -1.031 | 1                                   | -2.69516                | -4.5962  | -1.19365 |
| 23            | 6                                   | -2.356                  | -2.23 | 0.253  | 6                                   | -2.20977                | -2.24324 | 0.217976 |
| 24            | 1                                   | -2.621                  | -1.46 | 0.9775 | 1                                   | -2.46595                | -1.50542 | 0.984881 |
| 25            | 6                                   | -1.303                  | -1.66 | -0.706 | 6                                   | -1.17293                | -1.62549 | -0.72959 |
| 26            | 1                                   | -0.932                  | -2.45 | -1.37  | 1                                   | -0.80901                | -2.38219 | -1.4328  |
| 27            | 1                                   | -1.776                  | -0.91 | -1.345 | 1                                   | -1.65283                | -0.84574 | -1.32726 |
| 28            | 6                                   | -0.112                  | -1.05 | 0.0442 | 6                                   | 0.023904                | -1.0464  | 0.037601 |
| 29            | 1                                   | -0.464                  | -0.21 | 0.6646 | 1                                   | -0.32339                | -0.24035 | 0.698452 |
| 30            | 6                                   | 1.0465                  | -0.56 | -0.846 | 6                                   | 1.173581                | -0.51312 | -0.84057 |
| 31            | 6                                   | 0.6151                  | 0.603 | -1.756 | 6                                   | 0.730427                | 0.682493 | -1.69806 |
| 32            | 1                                   | 1.4274                  | 0.928 | -2.41  | 1                                   | 1.537785                | 1.038923 | -2.34204 |
| 33            | 1                                   | -0.225                  | 0.324 | -2.396 | 1                                   | -0.11031                | 0.425733 | -2.34692 |
| 34            | 1                                   | 0.3046                  | 1.467 | -1.155 | 1                                   | 0.417871                | 1.517748 | -1.06047 |
| 35            | 6                                   | 2.262                   | -0.18 | 0.0264 | 6                                   | 2.392592                | -0.17019 | 0.039509 |
| 36            | 1                                   | 2.0034                  | 0.689 | 0.6415 | 1                                   | 2.13365                 | 0.675979 | 0.691135 |
| 37            | 1                                   | 2.4477                  | -1.01 | 0.7291 | 1                                   | 2.586012                | -1.0194  | 0.70702  |
| 38            | 6                                   | 3.5614                  | 0.102 | -0.739 | 6                                   | 3.686214                | 0.152719 | -0.72055 |
| 39            | 1                                   | 3.7935                  | -0.76 | -1.384 | 1                                   | 3.919662                | -0.67779 | -1.40035 |
| 40            | 1                                   | 3.4178                  | 0.958 | -1.404 | 1                                   | 3.534578                | 1.033637 | -1.3506  |
| 41            | 6                                   | 4.752                   | 0.363 | 0.1939 | 6                                   | 4.879717                | 0.383771 | 0.216273 |
| 42            | 1                                   | 4.538                   | 1.241 | 0.8187 | 1                                   | 4.663409                | 1.235251 | 0.876553 |
| 43            | 6                                   | 6.1112                  | 0.567 | -0.506 | 6                                   | 6.234258                | 0.624809 | -0.48046 |
| 44            | 1                                   | 6.2736                  | -0.29 | -1.169 | 1                                   | 6.39901                 | -0.20913 | -1.17841 |
| 45            | 6                                   | 6.1256                  | 1.839 | -1.368 | 6                                   | 6.236689                | 1.93012  | -1.29125 |
| 46            | 1                                   | 5.3395                  | 1.823 | -2.126 | 1                                   | 5.446933                | 1.939043 | -2.04625 |
| 47            | 1                                   | 5.9694                  | 2.727 | -0.744 | 1                                   | 6.078557                | 2.791842 | -0.6321  |
| 48            | 6                                   | 7.2475                  | 0.568 | 0.5369 | 6                                   | 7.375226                | 0.591542 | 0.55638  |
| 49            | 1                                   | 7.1326                  | 1.447 | 1.1875 | 1                                   | 7.25665                 | 1.441159 | 1.243241 |
| 50            | 1                                   | 7.1212                  | -0.31 | 1.1853 | 1                                   | 7.258351                | -0.31194 | 1.168293 |
| 51            | 1                                   | 4.8433                  | -0.49 | 0.8841 | 1                                   | 4.979471                | -0.49076 | 0.871588 |



|    |   |        |       |        |   |          |          |          |
|----|---|--------|-------|--------|---|----------|----------|----------|
| 52 | 1 | 0.2827 | -1.8  | 0.741  | 1 | 0.425887 | -1.82732 | 0.695333 |
| 53 | 1 | 1.3481 | -1.4  | -1.488 | 1 | 1.474428 | -1.32506 | -1.51859 |
| 54 | 1 | 7.0769 | 1.962 | -1.891 | 1 | 7.184644 | 2.079875 | -1.81349 |
| 55 | 6 | 8.6712 | 0.544 | -0.036 | 6 | 8.796568 | 0.601989 | -0.02261 |
| 56 | 1 | 8.8568 | 1.45  | -0.624 | 1 | 8.973655 | 1.533868 | -0.57172 |
| 57 | 1 | 8.7573 | -0.3  | -0.731 | 1 | 8.885347 | -0.20937 | -0.75443 |
| 58 | 6 | 9.745  | 0.437 | 1.0553 | 6 | 9.875553 | 0.454764 | 1.058559 |
| 59 | 1 | 9.5875 | 1.248 | 1.7786 | 1 | 9.714638 | 1.230236 | 1.818474 |
| 60 | 1 | 9.6061 | -0.5  | 1.6133 | 1 | 9.746325 | -0.50725 | 1.574003 |
| 61 | 6 | 11.202 | 0.508 | 0.5588 | 6 | 11.32966 | 0.559386 | 0.560509 |
| 62 | 1 | 11.307 | 1.43  | -0.029 | 1 | 11.42614 | 1.509843 | 0.017478 |
| 63 | 6 | 12.172 | 0.596 | 1.7458 | 6 | 12.30379 | 0.598365 | 1.746768 |
| 64 | 1 | 13.208 | 0.686 | 1.4057 | 1 | 13.33789 | 0.712517 | 1.40747  |
| 65 | 1 | 11.949 | 1.461 | 2.378  | 1 | 12.07725 | 1.430198 | 2.420732 |
| 66 | 1 | 12.104 | -0.3  | 2.3716 | 1 | 12.24522 | -0.32842 | 2.32882  |
| 67 | 6 | 11.572 | -0.67 | -0.349 | 6 | 11.70449 | -0.57496 | -0.40463 |
| 68 | 1 | 11.457 | -1.62 | 0.1863 | 1 | 11.59844 | -1.54987 | 0.085257 |
| 69 | 1 | 10.946 | -0.72 | -1.244 | 1 | 11.07539 | -0.57977 | -1.29813 |
| 70 | 1 | 12.613 | -0.6  | -0.679 | 1 | 12.74396 | -0.47959 | -0.73309 |
| 71 | 1 | -1.919 | -3.05 | 0.8321 | 1 | -1.763   | -3.09252 | 0.747672 |
| 72 | 6 | -6.564 | -0.09 | 3.0337 | 6 | -6.60668 | -0.27712 | 3.012385 |
| 73 | 1 | -6.964 | 0.843 | 3.4344 | 1 | -7.08943 | 0.623021 | 3.387951 |
| 74 | 1 | -7.341 | -0.85 | 3.1295 | 1 | -7.32324 | -1.10312 | 3.087567 |
| 75 | 1 | -5.729 | -0.4  | 3.6681 | 1 | -5.7643  | -0.52627 | 3.663912 |
| 76 | 1 | -6.297 | 2.365 | -0.935 | 1 | -6.49428 | 2.209748 | -0.97985 |
| 77 | 8 | -7.147 | 2.255 | 1.555  | 8 | -7.30821 | 1.997034 | 1.467244 |
| 78 | 1 | -7.236 | 3.095 | 0.9944 | 1 | -8.00501 | 3.355634 | 0.754693 |
| 79 | 8 | -7.472 | 4.528 | 0.3278 | 8 | -8.46937 | 4.16583  | 0.409312 |
| 80 | 8 | -7.396 | 4.505 | -1.006 | 8 | -7.64044 | 4.51646  | -0.73161 |
| 81 |   |        |       |        | 1 | -7.13986 | 5.270831 | -0.38854 |

**Table S4.** Calculated geometries of the complexes formed between (a)  $\gamma$ -TOH and  $O_2^{\cdot-}$ , (b)  $\gamma$ -TOH and  $HO_2^{\cdot}$  in DMF, with DFT-(U)B3LYP/PCM/6-311+G(d,p).

| Center Number | (a) $\gamma$ -TOH and $O_2^{\cdot-}$ |                         |          |          | (b) $\gamma$ -TOH and $HO_2^{\cdot}$ |                         |          |          |
|---------------|--------------------------------------|-------------------------|----------|----------|--------------------------------------|-------------------------|----------|----------|
|               | Atomic Number                        | Coordinates (Angstroms) |          |          | Atomic Number                        | Coordinates (Angstroms) |          |          |
|               |                                      | X                       | Y        | Z        |                                      | X                       | Y        | Z        |
| 1             | 6                                    | -5.22019                | 0.261699 | 1.566365 | 6                                    | 5.356671                | -0.60672 | 1.4813   |
| 2             | 6                                    | -4.96933                | 0.819722 | 0.297819 | 6                                    | 4.957624                | -0.93222 | 0.145527 |
| 3             | 6                                    | -5.43483                | 0.198827 | -0.86594 | 6                                    | 5.436975                | -0.21455 | -0.98649 |
| 4             | 6                                    | -6.1502                 | -0.99591 | -0.74871 | 6                                    | 6.295501                | 0.829769 | -0.76549 |
| 5             | 6                                    | -6.4135                 | -1.56419 | 0.498216 | 6                                    | 6.714188                | 1.217677 | 0.555771 |
| 6             | 6                                    | -5.95564                | -0.93121 | 1.670959 | 6                                    | 6.215043                | 0.452423 | 1.696039 |
| 7             | 6                                    | -5.15664                | 0.802128 | -2.22576 | 6                                    | 5.00438                 | -0.62795 | -2.37231 |
| 8             | 1                                    | -4.3923                 | 0.20939  | -2.74191 | 1                                    | 4.216583                | 0.045208 | -2.72602 |
| 9             | 1                                    | -6.05377                | 0.739373 | -2.84882 | 1                                    | 5.840221                | -0.51009 | -3.06578 |
| 10            | 6                                    | -4.71305                | 0.953955 | 2.810423 | 6                                    | 4.804174                | -1.45275 | 2.600297 |
| 11            | 1                                    | -3.96825                | 1.707651 | 2.561979 | 1                                    | 3.711138                | -1.42309 | 2.606578 |
| 12            | 1                                    | -5.52657                | 1.455625 | 3.348377 | 1                                    | 5.087876                | -2.50095 | 2.469393 |
| 13            | 1                                    | -4.26543                | 0.240774 | 3.507531 | 1                                    | 5.161723                | -1.12083 | 3.572154 |
| 14            | 6                                    | -6.25554                | -1.53577 | 3.022912 | 6                                    | 6.670632                | 0.860839 | 3.072268 |
| 15            | 1                                    | -5.35143                | -1.93684 | 3.496423 | 1                                    | 5.823037                | 1.119339 | 3.713713 |
| 16            | 1                                    | -6.6701                 | -0.79371 | 3.711781 | 1                                    | 7.217135                | 0.052767 | 3.567944 |
| 17            | 1                                    | -6.96967                | -2.3521  | 2.928645 | 1                                    | 7.326904                | 1.726321 | 3.00545  |
| 18            | 6                                    | -4.70501                | 2.259664 | -2.10972 | 6                                    | 4.513732                | -2.07654 | -2.37795 |
| 19            | 1                                    | -4.27801                | 2.609538 | -3.05375 | 1                                    | 4.048047                | -2.32276 | -3.33491 |
| 20            | 1                                    | -5.56922                | 2.895932 | -1.89126 | 1                                    | 5.365424                | -2.75213 | -2.25057 |
| 21            | 6                                    | -3.68218                | 2.457578 | -0.979   | 6                                    | 3.508401                | -2.35205 | -1.2536  |
| 22            | 8                                    | -4.28735                | 2.024237 | 0.273675 | 8                                    | 4.126252                | -1.97563 | 0.040706 |
| 23            | 6                                    | -3.40115                | 3.9453   | -0.7752  | 6                                    | 3.242624                | -3.84751 | -1.11609 |
| 24            | 1                                    | -4.33851                | 4.49302  | -0.6517  | 1                                    | 4.184124                | -4.39524 | -1.0382  |
| 25            | 1                                    | -2.78781                | 4.11343  | 0.111521 | 1                                    | 2.643304                | -4.06316 | -0.23099 |
| 26            | 1                                    | -2.8739                 | 4.35313  | -1.64159 | 1                                    | 2.703401                | -4.20922 | -1.99491 |
| 27            | 6                                    | -2.39041                | 1.650697 | -1.23657 | 6                                    | 2.216423                | -1.52662 | -1.41388 |
| 28            | 1                                    | -2.65324                | 0.592306 | -1.33057 | 1                                    | 2.479994                | -0.46445 | -1.43373 |
| 29            | 6                                    | -1.28904                | 1.783702 | -0.17676 | 6                                    | 1.133024                | -1.74282 | -0.34898 |
| 30            | 1                                    | -0.91666                | 2.813813 | -0.14727 | 1                                    | 0.760338                | -2.77161 | -0.39673 |
| 31            | 1                                    | -1.71799                | 1.57731  | 0.807708 | 1                                    | 1.573532                | -1.6134  | 0.64333  |
| 32            | 6                                    | -0.1099                 | 0.840545 | -0.45323 | 6                                    | -0.04724                | -0.77946 | -0.53667 |
| 33            | 1                                    | -0.46139                | -0.19999 | -0.4205  | 1                                    | 0.304829                | 0.254336 | -0.41695 |
| 34            | 6                                    | 1.095036                | 0.990768 | 0.497135 | 6                                    | -1.24473                | -1.01314 | 0.405979 |
| 35            | 6                                    | 0.729363                | 0.628019 | 1.944794 | 6                                    | -0.86581                | -0.78949 | 1.878208 |
| 36            | 1                                    | 1.575162                | 0.766492 | 2.622504 | 1                                    | -1.70965                | -0.97966 | 2.545584 |
| 37            | 1                                    | -0.09067                | 1.244263 | 2.320979 | 1                                    | -0.05199                | -1.44783 | 2.191495 |
| 38            | 1                                    | 0.416362                | -0.42061 | 2.010563 | 1                                    | -0.53967                | 0.244874 | 2.038131 |
| 39            | 6                                    | 2.283602                | 0.15677  | -0.02239 | 6                                    | -2.43281                | -0.12852 | -0.02319 |
| 40            | 1                                    | 2.021768                | -0.90898 | 0.03546  | 1                                    | -2.16951                | 0.925316 | 0.143399 |
| 41            | 1                                    | 2.420343                | 0.378133 | -1.08847 | 1                                    | -2.57236                | -0.23906 | -1.10597 |
| 42            | 6                                    | 3.619831                | 0.389728 | 0.695757 | 6                                    | -3.76759                | -0.43353 | 0.670185 |
| 43            | 1                                    | 3.858904                | 1.461484 | 0.670183 | 1                                    | -4.01109                | -1.49503 | 0.527778 |
| 44            | 1                                    | 3.524059                | 0.120324 | 1.75137  | 1                                    | -3.66729                | -0.28212 | 1.748616 |
| 45            | 6                                    | 4.775613                | -0.39659 | 0.06218  | 6                                    | -4.92188                | 0.422404 | 0.131211 |
| 46            | 1                                    | 4.554751                | -1.47186 | 0.114804 | 1                                    | -4.69991                | 1.483953 | 0.309026 |
| 47            | 6                                    | 6.167451                | -0.14317 | 0.676048 | 6                                    | -6.31481                | 0.100727 | 0.709558 |
| 48            | 1                                    | 6.339113                | 0.943219 | 0.667094 | 1                                    | -6.49144                | -0.97518 | 0.564688 |
| 49            | 6                                    | 6.246636                | -0.62435 | 2.133269 | 6                                    | -6.39202                | 0.396101 | 2.215558 |
| 50            | 1                                    | 5.491188                | -0.14395 | 2.759643 | 1                                    | -5.64283                | -0.16681 | 2.777383 |

|    |   |          |          |          |   |          |          |          |
|----|---|----------|----------|----------|---|----------|----------|----------|
| 51 | 1 | 6.087157 | -1.70763 | 2.189099 | 1 | -6.22187 | 1.462166 | 2.406854 |
| 52 | 6 | 7.257649 | -0.79033 | -0.20171 | 6 | -7.40185 | 0.858032 | -0.07959 |
| 53 | 1 | 7.130143 | -1.88164 | -0.18029 | 1 | -7.2747  | 1.936949 | 0.086024 |
| 54 | 1 | 7.087809 | -0.48546 | -1.2422  | 1 | -7.2283  | 0.693024 | -1.15058 |
| 55 | 1 | 4.818821 | -0.1477  | -1.00573 | 1 | -4.96436 | 0.299667 | -0.95845 |
| 56 | 1 | 0.238193 | 1.011086 | -1.48001 | 1 | -0.40228 | -0.86214 | -1.57165 |
| 57 | 1 | 1.400289 | 2.047294 | 0.478157 | 1 | -1.55534 | -2.06174 | 0.290111 |
| 58 | 1 | 7.220757 | -0.40778 | 2.578284 | 1 | -7.36919 | 0.135438 | 2.629063 |
| 59 | 6 | 8.704336 | -0.44158 | 0.173782 | 6 | -8.84975 | 0.462785 | 0.241123 |
| 60 | 1 | 8.932755 | -0.81186 | 1.179766 | 1 | -9.07994 | 0.689708 | 1.288388 |
| 61 | 1 | 8.804986 | 0.649223 | 0.215809 | 1 | -8.95172 | -0.6231  | 0.130732 |
| 62 | 6 | 9.726692 | -1.02595 | -0.8102  | 6 | -9.86951 | 1.180118 | -0.65355 |
| 63 | 1 | 9.550738 | -2.10611 | -0.89403 | 1 | -9.69622 | 2.261475 | -0.5805  |
| 64 | 1 | 9.547515 | -0.61028 | -1.81167 | 1 | -9.68511 | 0.913018 | -1.70357 |
| 65 | 6 | 11.20502 | -0.8038  | -0.43793 | 6 | -11.3487 | 0.903137 | -0.32375 |
| 66 | 1 | 11.35261 | -1.19364 | 0.578842 | 1 | -11.5008 | 1.137989 | 0.738929 |
| 67 | 6 | 12.12264 | -1.59663 | -1.37975 | 6 | -12.2648 | 1.825077 | -1.14139 |
| 68 | 1 | 13.17429 | -1.47928 | -1.10083 | 1 | -13.3172 | 1.665115 | -0.88779 |
| 69 | 1 | 11.8865  | -2.66495 | -1.35942 | 1 | -12.0318 | 2.879033 | -0.96134 |
| 70 | 1 | 12.01217 | -1.24991 | -2.41354 | 1 | -12.149  | 1.636254 | -2.21475 |
| 71 | 6 | 11.59449 | 0.681797 | -0.43418 | 6 | -11.7348 | -0.56731 | -0.54151 |
| 72 | 1 | 11.4391  | 1.124456 | -1.42494 | 1 | -11.5754 | -0.85777 | -1.58646 |
| 73 | 1 | 11.00856 | 1.259029 | 0.285281 | 1 | -11.1496 | -1.24379 | 0.08626  |
| 74 | 1 | 12.65057 | 0.807161 | -0.17626 | 1 | -12.7913 | -0.73155 | -0.30852 |
| 75 | 1 | -1.99839 | 1.956281 | -2.21421 | 1 | 1.808401 | -1.759   | -2.40429 |
| 76 | 1 | -6.51434 | -1.49963 | -1.64142 | 1 | 6.693979 | 1.395795 | -1.60061 |
| 77 | 8 | -7.11045 | -2.73178 | 0.613526 | 8 | 7.504018 | 2.196273 | 0.723649 |
| 78 | 1 | -7.46175 | -3.05547 | -0.281   | 1 | 8.224704 | 3.11666  | -0.48819 |
| 79 | 8 | -7.67684 | -3.28395 | -2.71594 | 8 | 8.701511 | 3.686244 | -1.15068 |
| 80 | 8 | -8.14733 | -3.74213 | -1.55203 | 8 | 7.64167  | 4.580257 | -1.58561 |
| 81 |   |          |          |          | 1 | 7.858517 | 5.392582 | -1.10567 |

**Table S5.** Calculated geometries of the complexes formed between (a)  $\delta$ -TOH and  $O_2^{\bullet-}$ , (b)  $\delta$ -TOH and  $HO_2^{\bullet}$  in DMF, with DFT-(U)B3LYP/PCM/6-311+G(d,p).

| Center Number | (a) $\delta$ -TOH and $O_2^{\bullet-}$ |                         |          |          | (b) $\delta$ -TOH and $HO_2^{\bullet}$ |                         |          |          |
|---------------|----------------------------------------|-------------------------|----------|----------|----------------------------------------|-------------------------|----------|----------|
|               | Atomic Number                          | Coordinates (Angstroms) |          |          | Atomic Number                          | Coordinates (Angstroms) |          |          |
|               |                                        | X                       | Y        | Z        |                                        | X                       | Y        | Z        |
| 1             | 6                                      | 5.585417                | 0.448225 | 0.872997 | 6                                      | 5.545846                | 0.227373 | 0.977627 |
| 2             | 6                                      | 5.223187                | -0.72842 | 0.190994 | 6                                      | 5.174271                | -0.88301 | 0.196705 |
| 3             | 6                                      | 5.609103                | -0.93308 | -1.1385  | 6                                      | 5.564437                | -0.98143 | -1.14467 |
| 4             | 6                                      | 6.35258                 | 0.058567 | -1.78957 | 6                                      | 6.323215                | 0.050496 | -1.70789 |
| 5             | 6                                      | 6.716378                | 1.235374 | -1.13638 | 6                                      | 6.691909                | 1.158232 | -0.95353 |
| 6             | 6                                      | 6.329389                | 1.417713 | 0.199884 | 6                                      | 6.303345                | 1.239176 | 0.387247 |
| 7             | 6                                      | 5.222752                | -2.20809 | -1.85513 | 6                                      | 5.16821                 | -2.18805 | -1.96564 |
| 8             | 1                                      | 4.418803                | -2.00018 | -2.57074 | 1                                      | 4.369655                | -1.91168 | -2.66356 |
| 9             | 1                                      | 6.06728                 | -2.56819 | -2.45013 | 1                                      | 6.011712                | -2.5057  | -2.58534 |
| 10            | 6                                      | 5.179701                | 0.646208 | 2.312309 | 6                                      | 5.134479                | 0.309794 | 2.425304 |
| 11            | 1                                      | 5.612752                | -0.12359 | 2.959109 | 1                                      | 5.556592                | -0.51641 | 3.005855 |
| 12            | 1                                      | 5.50917                 | 1.621304 | 2.675412 | 1                                      | 5.470577                | 1.247379 | 2.871392 |
| 13            | 1                                      | 4.094394                | 0.580722 | 2.433481 | 1                                      | 4.048082                | 0.244349 | 2.533144 |
| 14            | 6                                      | 4.78461                 | -3.29066 | -0.86562 | 6                                      | 4.715147                | -3.34348 | -1.06994 |
| 15            | 1                                      | 4.297489                | -4.11831 | -1.38835 | 1                                      | 4.22264                 | -4.11993 | -1.66121 |
| 16            | 1                                      | 5.664385                | -3.70217 | -0.3597  | 1                                      | 5.588375                | -3.80402 | -0.59627 |
| 17            | 6                                      | 3.837626                | -2.74005 | 0.213774 | 6                                      | 3.76761                 | -2.87448 | 0.046076 |
| 18            | 8                                      | 4.516498                | -1.66233 | 0.923692 | 8                                      | 4.453214                | -1.86116 | 0.844322 |
| 19            | 6                                      | 3.578788                | -3.80078 | 1.282031 | 6                                      | 3.496515                | -4.01472 | 1.025109 |
| 20            | 1                                      | 4.525035                | -4.2009  | 1.653877 | 1                                      | 4.437996                | -4.45069 | 1.367384 |
| 21            | 1                                      | 3.029123                | -3.38282 | 2.126919 | 1                                      | 2.945407                | -3.66191 | 1.898155 |
| 22            | 1                                      | 2.994811                | -4.62491 | 0.864098 | 1                                      | 2.908771                | -4.79796 | 0.539517 |
| 23            | 6                                      | 2.528019                | -2.20335 | -0.40505 | 6                                      | 2.465992                | -2.2754  | -0.52979 |
| 24            | 1                                      | 2.778748                | -1.41608 | -1.12312 | 1                                      | 2.726212                | -1.43329 | -1.17904 |
| 25            | 6                                      | 1.4918                  | -1.64755 | 0.580451 | 6                                      | 1.43154                 | -1.79516 | 0.496437 |
| 26            | 1                                      | 1.130795                | -2.4462  | 1.238041 | 1                                      | 1.058697                | -2.64399 | 1.080304 |
| 27            | 1                                      | 1.97509                 | -0.9067  | 1.223253 | 1                                      | 1.92011                 | -1.1188  | 1.203154 |
| 28            | 1                                      | 2.079834                | -3.01735 | -0.98774 | 1                                      | 2.013161                | -3.03362 | -1.17996 |
| 29            | 6                                      | 0.29008                 | -1.02352 | -0.14269 | 6                                      | 0.240534                | -1.09582 | -0.17346 |
| 30            | 1                                      | -0.11528                | -1.7634  | -0.84467 | 1                                      | -0.16711                | -1.76362 | -0.94305 |
| 31            | 1                                      | 0.633102                | -0.17873 | -0.75586 | 1                                      | 0.595451                | -0.20138 | -0.70397 |
| 32            | 6                                      | -0.85608                | -0.54478 | 0.770944 | 6                                      | -0.90709                | -0.69284 | 0.774281 |
| 33            | 1                                      | -1.14799                | -1.39396 | 1.40614  | 1                                      | -1.21809                | -1.59707 | 1.317703 |
| 34            | 6                                      | -0.41248                | 0.604582 | 1.689166 | 6                                      | -0.45504                | 0.350485 | 1.807823 |
| 35            | 1                                      | 0.437261                | 0.318031 | 2.313311 | 1                                      | 0.37878                 | -0.014   | 2.412539 |
| 36            | 1                                      | -0.11209                | 1.476172 | 1.095887 | 1                                      | -0.12845                | 1.269844 | 1.307768 |
| 37            | 1                                      | -1.21534                | 0.918897 | 2.360298 | 1                                      | -1.262                  | 0.613985 | 2.495683 |
| 38            | 6                                      | -2.08379                | -0.16124 | -0.07984 | 6                                      | -2.1202                 | -0.20422 | -0.04292 |
| 39            | 1                                      | -2.28036                | -0.97615 | -0.78803 | 1                                      | -2.31466                | -0.9316  | -0.84125 |
| 40            | 1                                      | -1.83293                | 0.717735 | -0.68991 | 1                                      | -1.85408                | 0.735702 | -0.54637 |
| 41            | 6                                      | -3.37203                | 0.118452 | 0.706146 | 6                                      | -3.41615                | -0.00334 | 0.754395 |
| 42            | 1                                      | -3.21976                | 0.970829 | 1.374234 | 1                                      | -3.26136                | 0.754932 | 1.527124 |
| 43            | 1                                      | -3.59397                | -0.74358 | 1.349675 | 1                                      | -3.66136                | -0.93587 | 1.280408 |
| 44            | 6                                      | -4.57595                | 0.383587 | -0.20808 | 6                                      | -4.60112                | 0.397011 | -0.13506 |
| 45            | 1                                      | -4.37064                | 1.264163 | -0.83274 | 1                                      | -4.37674                | 1.352416 | -0.62968 |
| 46            | 1                                      | -4.67746                | -0.46215 | -0.89992 | 1                                      | -4.69776                | -0.34494 | -0.9378  |
| 47            | 6                                      | -5.92483                | 0.586311 | 0.511458 | 6                                      | -5.96122                | 0.51437  | 0.582273 |
| 48            | 1                                      | -6.07646                | -0.27619 | 1.176952 | 1                                      | -6.13929                | -0.43502 | 1.1083   |
| 49            | 6                                      | -7.0764                 | 0.586194 | -0.51416 | 6                                      | -7.09093                | 0.688321 | -0.45273 |
| 50            | 1                                      | -6.97085                | 1.463343 | -1.16773 | 1                                      | -6.96142                | 1.653713 | -0.96156 |
| 51            | 1                                      | -6.95976                | -0.29128 | -1.16286 | 1                                      | -6.97101                | -0.08081 | -1.22634 |

|    |   |          |          |          |   |          |          |          |
|----|---|----------|----------|----------|---|----------|----------|----------|
| 52 | 6 | -5.92794 | 1.857991 | 1.374003 | 6 | -5.96345 | 1.642663 | 1.625466 |
| 53 | 1 | -5.78369 | 2.746615 | 0.748257 | 1 | -5.78865 | 2.611739 | 1.143387 |
| 54 | 1 | -6.87102 | 1.979216 | 1.91227  | 1 | -6.9173  | 1.70152  | 2.155147 |
| 55 | 1 | -5.1297  | 1.842987 | 2.119948 | 1 | -5.18429 | 1.49969  | 2.377977 |
| 56 | 6 | -8.49166 | 0.563134 | 0.079221 | 6 | -8.51857 | 0.595293 | 0.102867 |
| 57 | 1 | -8.56712 | -0.27741 | 0.778907 | 1 | -8.61938 | -0.3426  | 0.661335 |
| 58 | 1 | -8.66946 | 1.471059 | 0.666903 | 1 | -8.6976  | 1.403387 | 0.821344 |
| 59 | 6 | -9.58078 | 0.451203 | -0.99601 | 6 | -9.58594 | 0.66896  | -0.99723 |
| 60 | 1 | -9.44954 | -0.48798 | -1.5515  | 1 | -9.45354 | -0.17341 | -1.69056 |
| 61 | 1 | -9.43374 | 1.258195 | -1.7253  | 1 | -9.41451 | 1.578041 | -1.58791 |
| 62 | 6 | -11.0304 | 0.52364  | -0.47944 | 6 | -11.0452 | 0.680304 | -0.50332 |
| 63 | 1 | -11.1282 | 1.449718 | 0.103968 | 1 | -11.1449 | 1.504813 | 0.216266 |
| 64 | 6 | -11.3869 | -0.65309 | 0.440809 | 6 | -11.434  | -0.6209  | 0.213912 |
| 65 | 1 | -10.7481 | -0.69103 | 1.326563 | 1 | -10.8149 | -0.80608 | 1.09511  |
| 66 | 1 | -12.4234 | -0.57931 | 0.784061 | 1 | -12.4768 | -0.58725 | 0.544205 |
| 67 | 1 | -11.2795 | -1.60564 | -0.09097 | 1 | -11.3255 | -1.47986 | -0.45849 |
| 68 | 6 | -12.017  | 0.604836 | -1.65321 | 6 | -12.0061 | 0.958388 | -1.66821 |
| 69 | 1 | -13.0484 | 0.696312 | -1.29908 | 1 | -13.0435 | 1.008289 | -1.32349 |
| 70 | 1 | -11.8037 | 1.466135 | -2.29365 | 1 | -11.7697 | 1.90607  | -2.16168 |
| 71 | 1 | -11.9575 | -0.29606 | -2.27449 | 1 | -11.9439 | 0.164955 | -2.42171 |
| 72 | 1 | 6.620011 | 2.332721 | 0.710095 | 1 | 6.592876 | 2.100297 | 0.981354 |
| 73 | 1 | 6.659338 | -0.09083 | -2.82034 | 1 | 6.636367 | -0.0138  | -2.74492 |
| 74 | 8 | 7.439754 | 2.166238 | -1.81674 | 8 | 7.435763 | 2.137935 | -1.56578 |
| 75 | 1 | 7.661209 | 2.977293 | -1.24547 | 1 | 7.661409 | 2.840931 | -0.93276 |
| 76 | 8 | 8.129088 | 4.330434 | -0.55782 | 8 | 7.721971 | 5.44325  | -0.28311 |
| 77 | 8 | 7.754442 | 4.435801 | 0.720565 | 1 | 8.064547 | 6.156171 | 0.294619 |
| 78 |   |          |          |          | 8 | 8.250556 | 4.318577 | 0.168432 |
